# Supplementary material for: Influence of the Bile Acid Transporter Genes ABCB4, ABCB8, and ABCB11 and the Farnesoid X Receptor on the Response to Ursodeoxycholic Acid in Patients with Nonalcoholic Steatohepatitis
Source: MDPI journal article supplement (doi:10.3390/jpm13071180), 2023-07-24
Supplement: s1 [file s1]

## Tables:

## Figures:

## Supplements:

| Polymorphism per patient | Absolute decrease<br>ALT<br>Median (U/l) (min-max) | p-value | Relative decrease<br>ALT<br>Median % (min-max) | p-value |
|--------------------------|----------------------------------------------------|---------|------------------------------------------------|---------|
| 1 (n=1)                  | 32 (32–32)                                         | 0.205   | 110 (110–110)                                  | 0.262   |
| 2 (n=3)                  | -9 (-45–25.8)                                      |         | -6.87 (-64.3–159)                              |         |
| 3 (n=6)                  | -28 (-44.4–7)                                      |         | -38.5 (-68.8–12.3)                             |         |
| 4 (n=14)                 | -10.3 (-60–9)                                      |         | -26.1 (-52.5–36)                               |         |
| 5 (n=4)                  | -0.5 (-60–19.2)                                    |         | 2.59 (-71.4–24.6)                              |         |

| Polymorphism per patient | Absolute decrease<br>GGT<br>Median (U/l) (min-max) | p-value | Relative decrease<br>GGT<br>Median % (min-max) | p-value |
|--------------------------|----------------------------------------------------|---------|------------------------------------------------|---------|
| 1 (n=1)                  | 20 (20–20)                                         | 0.331   | 22 (22–22)                                     | 0.812   |
| 2 (n=3)                  | -57.6 (-137–173)                                   |         | -69.2 (-72.2–59)                               |         |
| 3 (n=6)                  | -107 (-360–14)                                     |         | -64.5 (-80.9–12.7)                             |         |
| 4 (n=14)                 | -72.8 (-1084–96)                                   |         | -54.6 (-84–61.8)                               |         |
| 5 (n=4)                  | -284 (-1105–68.4)                                  |         | -35.7 (-94.4–22.5)                             |         |

| Polymorphism per patient | Absolute decrease<br>Fib 4<br>Median (min-max) | p-value | Relative decrease<br>Fib 4<br>Median % (min-max) | p-value |
|--------------------------|------------------------------------------------|---------|--------------------------------------------------|---------|
| 1 (n=1)                  | 3.26 (3.26–3.26)                               | 0.131   | 182 (182–182)                                    | 0.203   |
| 2 (n=3)                  | 0.069 (-0.882–0.151)                           |         | 11.9 (-28.4–23.3)                                |         |
| 3 (n=6)                  | -0.012 (-0.209–0.114)                          |         | -2.14 (-27.2–13)                                 |         |
| 4 (n=14)                 | 0.162 (-0.81–5.85)                             |         | 16.3 (-62.4–∞)                                   |         |

|         |                     |  |                   |  |
|---------|---------------------|--|-------------------|--|
| 5 (n=4) | 0.416 (-0.087–2.14) |  | 33.1 (-18.1–50.9) |  |
|---------|---------------------|--|-------------------|--|

**Table S1:** Absolute and relative decrease of ALT, GGT, and Fib-4 per number of polymorphism per patients. P-values have been calculated with Kruskal-Wallis Test. Positive values show an increase and negative values a decrease.

|           | 1-2 polymorphism<br>(n=4) | 3-5 polymorphism<br>(n=24) | p-value (Wilcoxon) |
|-----------|---------------------------|----------------------------|--------------------|
|           | Median (min-max)          | Median                     |                    |
| ALT (U/l) | 8.4 (-45–32)              | -11.8 (-60–19.2)           | 0.29               |
| GGT (U/l) | -18.8 (-137–173)          | -96.5 (-1105–96)           | 0.14               |
| Fib-4     | 0.11 (-0.882–3.26)        | 0.112 (-0.81–5.85)         | 1                  |

**Table S2:** Absolute decrease of ALT and GGT in patients with 1-2 concurrent polymorphisms compared to patients with 3-5 polymorphisms. P-values were calculated using paired Wilcoxon tests. Positive values indicate an increase and negative values a decrease.

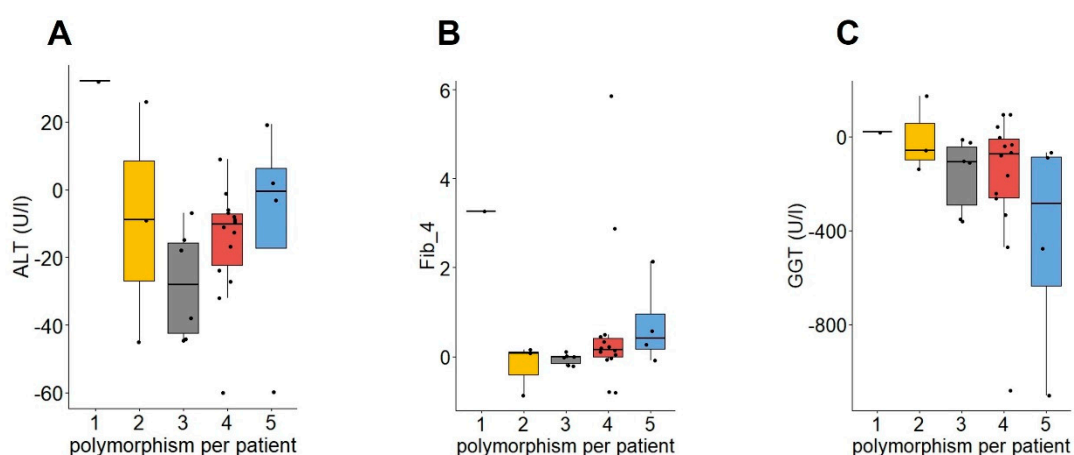

**Figure S1:** ALT (A) and Fib-4 (B) show the highest decrease in patients with 3 concurrent polymorphisms, while GGT (C) decreased with every polymorphism without reaching significance. Due to the small number of patients per group pairwise comparisons were not calculated.
